# Supplementary material for: Leveraging Multiple Analytic Frameworks to Assess the Stability of Students’ Knowledge in Physiology
Source: Atypon-hosted journal article supplement (doi:10.1187/cbe.18-08-0160), 2020-01-23
Supplement: combinedsupmats.pdf [file combinedsupmats.pdf]

# Supplemental Material

*CBE—Life Sciences Education*

Lira and Gardner

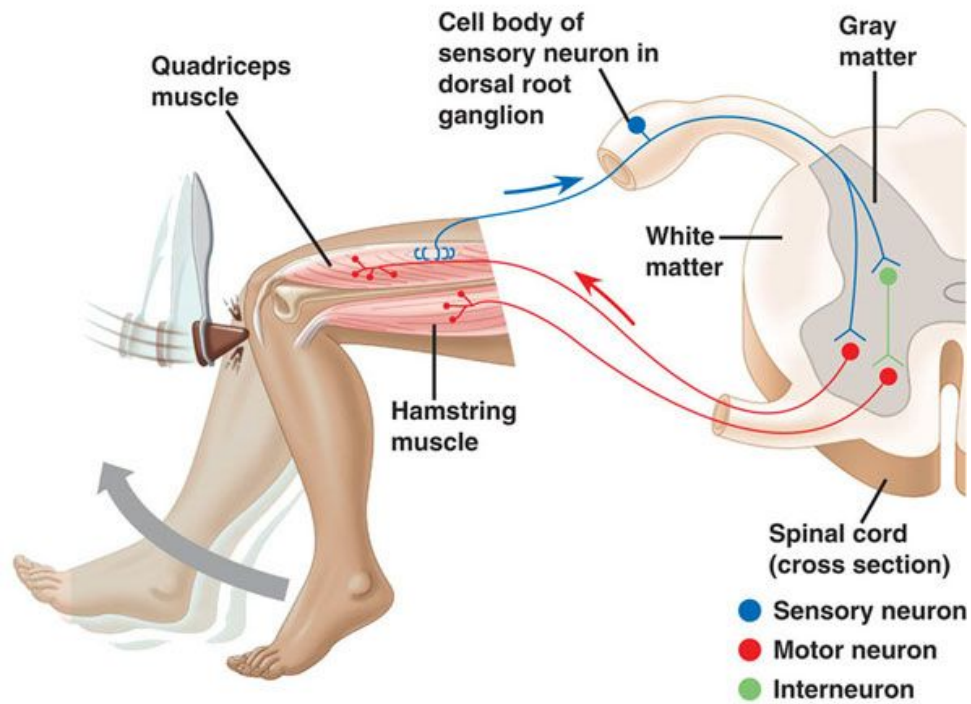

**Appendix A. Diagrammatic representation of the canonical model of the knee jerk reflex.** Image presented to participants during the *interpretation task* of the interview. Image from: CAMPBELL, NEIL A.; REECE, JANE B., *BIOLOGY*, 8th, ©2008. Reprinted by permission of Pearson Education, Inc., New York, New York.
